# Supplementary material
Source: Elsevier journal article supplement (https://comptes-rendus.academie-sciences.fr/geoscience/article/10.1016/j.crte.2018.06.004/file/attach/mmc3.pdf)
Supplement: mmc3 [file mmc3.pdf]

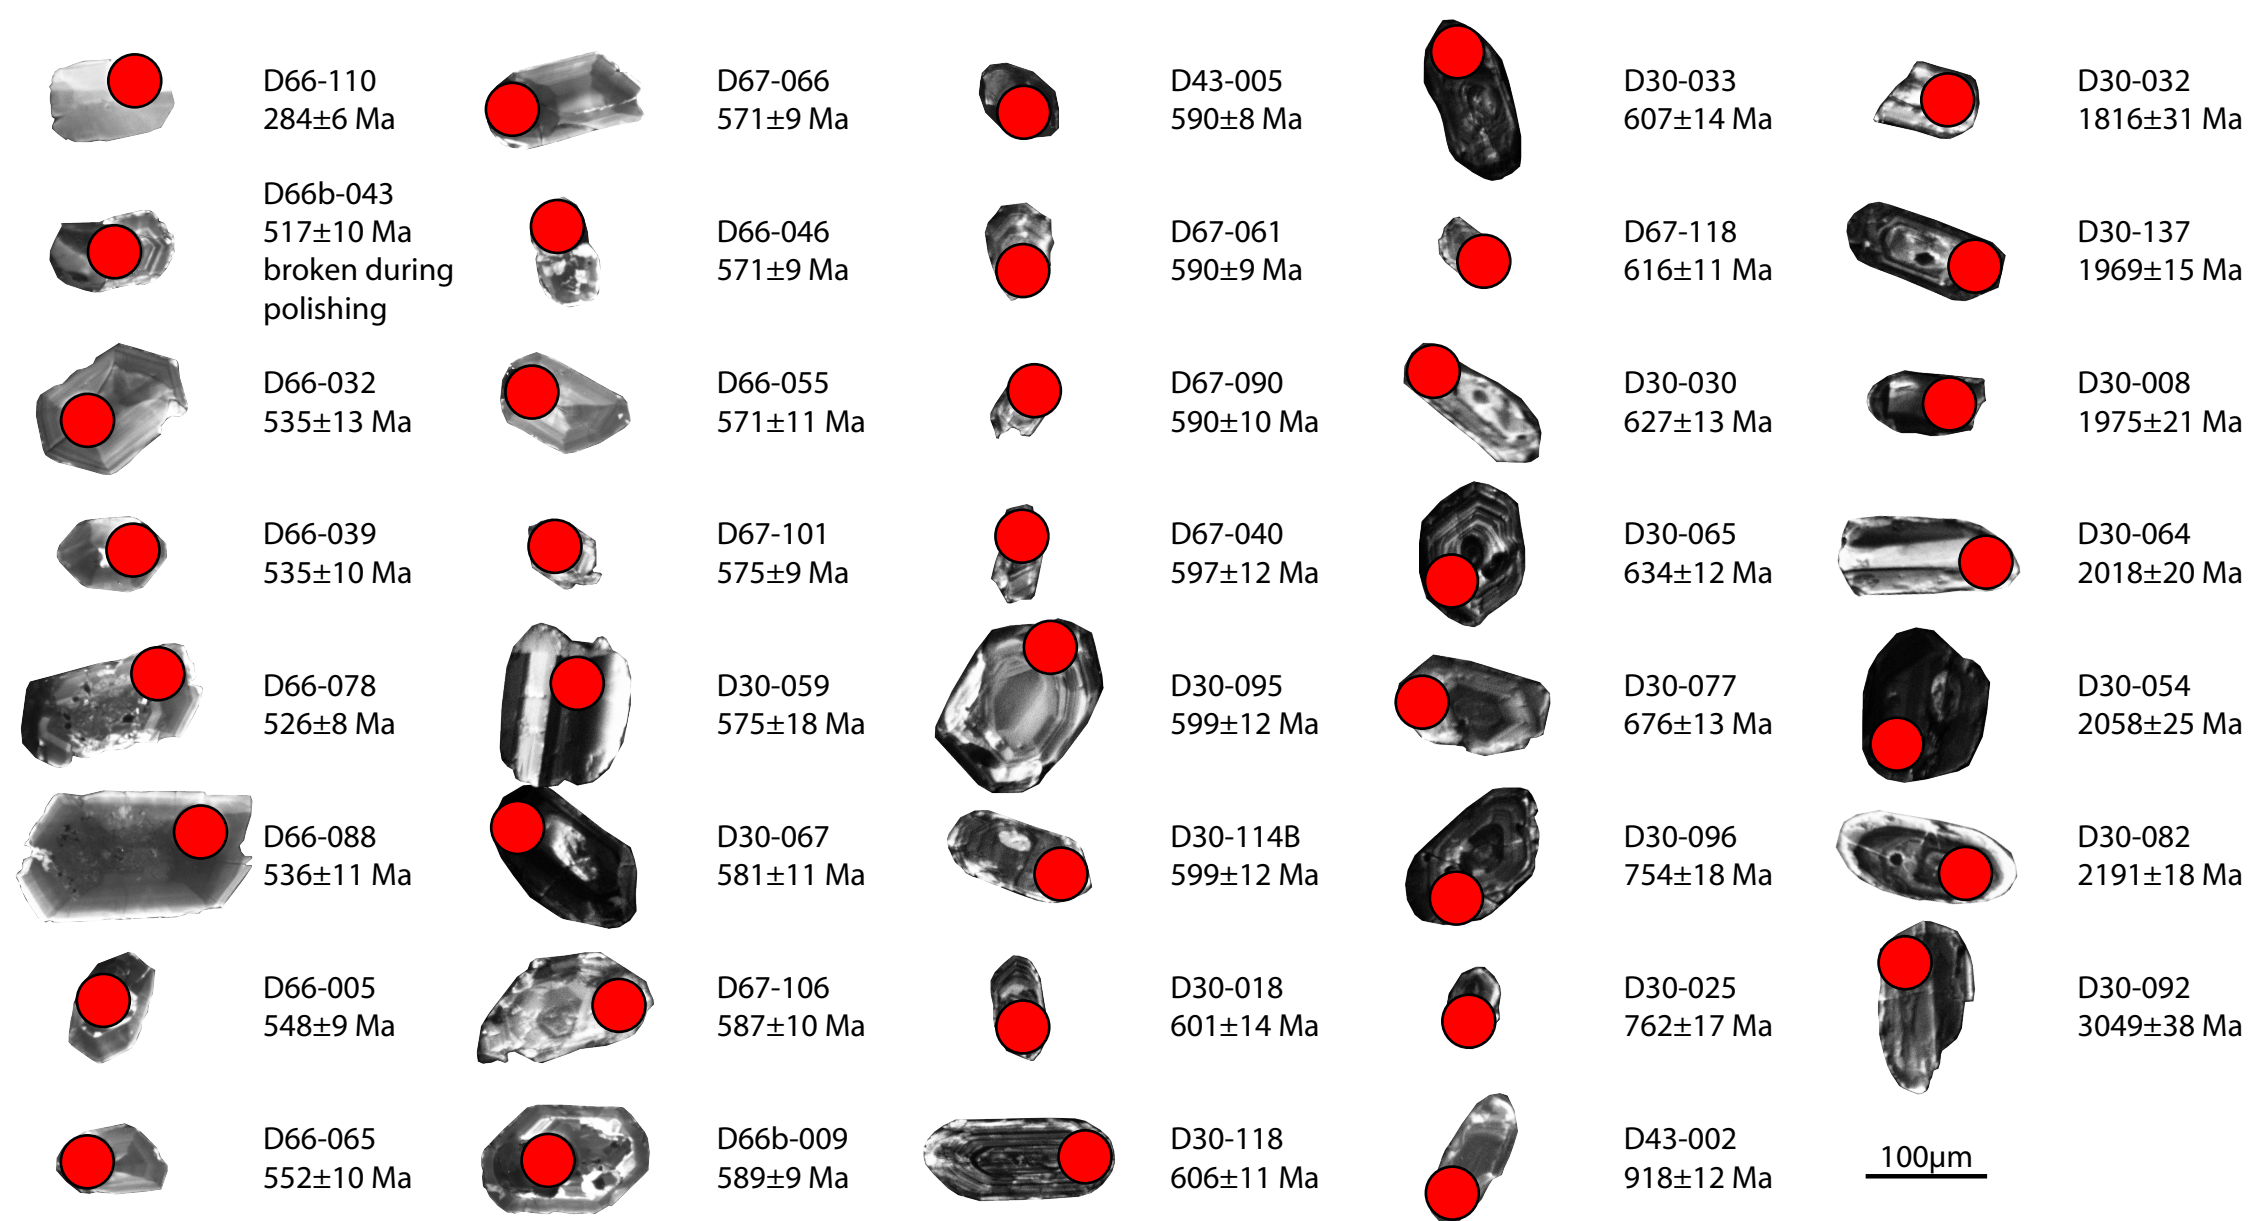

**Supplementary figure 3:** Selected CL images of the most abundant zircon age groups.
